# Supplementary material for: Review of epidemiological risk models for foot-and-mouth disease: Implications for prevention strategies with a focus on Africa
Source: PubMed Central journal article supplement (PMC6292601; doi:10.1371/journal.pone.0208296), 2018-12-13
Supplement: pone.0208296.s002.pdf [file pone.0208296.s002.pdf]

**S2 Table. Search strategies and results for PubMed & Scopus databases**

| <b>Last date of search</b> | <b>Database consulted</b> | <b>Search algorithms applied</b>                | <b>Results</b> |
|----------------------------|---------------------------|-------------------------------------------------|----------------|
| 15-12-16                   | Pubmed                    | Foot-and-Mouth Disease AND Epidemiology         | 1170           |
|                            | Scopus                    |                                                 | 790            |
| <i>Subtotal 1</i>          |                           |                                                 | 1960           |
| 15-12-16                   | Pubmed                    | Foot-and-Mouth Disease AND Epidemiology AND     | 56             |
|                            | Scopus                    | Risk assessment*                                | 37             |
| <i>Subtotal 2</i>          |                           |                                                 | 93             |
| 15-12-16                   | Pubmed                    | Foot-and-Mouth Disease AND Model*               | 466            |
|                            | Scopus                    |                                                 | 223            |
| <i>Subtotal 3</i>          |                           |                                                 | 689            |
| 15-12-16                   | Pubmed                    | Foot-and-Mouth Disease AND Risk factor AND      | 95             |
|                            | Scopus                    | Model*                                          | 84             |
| <i>Subtotal 4</i>          |                           |                                                 | 179            |
| 15-12-16                   | Pubmed                    | Foot-and-Mouth Disease AND Quantitative AND     | 20             |
|                            | Scopus                    | Risk AND Assessment                             | 36             |
| <i>Subtotal 5</i>          |                           |                                                 | 56             |
| 15-12-16                   | Pubmed                    | Foot-and-Mouth Disease AND Qualitative AND Risk | 8              |
|                            | Scopus                    | Assessment                                      | 10             |
| <i>Subtotal 6</i>          |                           |                                                 | 18             |
| 15-12-16                   | Pubmed                    | Foot-and-Mouth Disease AND Spread AND Model*    | 154            |
|                            | Scopus                    |                                                 | 171            |
| <i>Subtotal 7</i>          |                           |                                                 | 325            |
| 15-12-16                   | Pubmed                    | Foot-and-Mouth Disease AND Transmission AND     | 194            |
|                            | Scopus                    | Model*                                          | 204            |
| <i>Subtotal 8</i>          |                           |                                                 | 398            |
| <b>Total of records</b>    |                           |                                                 | <b>3718</b>    |
